# Supplementary material for: Integrated Oncogenomic Profiling of Copy Numbers and Gene Expression in Lung Adenocarcinomas without EGFR Mutations or ALK Fusion
Source: PubMed Central journal article supplement — J Cancer. 2018 Feb 28;9(6):1096–105. doi: 10.7150/jca.23909 (PMC5868177; doi:10.7150/jca.23909), 2018-02-28
Supplement: jcav09p1096s1.pdf [file jcav09p1096s1.pdf]

## Supplemental Data

### Integrated Oncogenomic Profiling of Copy Numbers and Gene Expression in Lung Adenocarcinomas without EGFR Mutations or ALK Fusion

**Table S1.** List of DNA oligo sequences for the primers used for RT-qPCR.

| <b>Primer Name</b>     | <b>Sequence</b>          |
|------------------------|--------------------------|
| Human PTEN-realtime-F  | CAGCCATCATCAAAGAGATCG    |
| Human PTEN-realtime-R  | ACGCCTTCAAGTCTTTCTGCA    |
| Human RB1-realtime-F   | CAAATGCAGAGACACAAGCA     |
| Human RB1-realtime-R   | AGACAGAAGGCGTTCACAAA     |
| Human HMGA2-realtime-F | TCCTAAGAGACCCAGGGGAA     |
| Human HMGA2-realtime-R | TGAGCAGGCTTCTTCTGAACA    |
| Human PTPRD-realtime-F | ACGGGAGACCCAAGACCTAAA    |
| Human PTPRD-realtime-R | TTCTCCCACATTATTTGAGGC    |
| Human GAPDH-realtime-F | CCCCTTCATTGACCTCAACTACAT |
| Human GAPDH-realtime-R | CGCTCCTGGAAGATGGTGA      |

**Table S2.** Correlation analysis of all 23 candidate genes based on their copy numbers in tumor tissues of LUAD patients without *EGFR/ALK* alterations.

|        | BCL2L1 | EMSY  | CCND1 | CCNE1 | CDK4  | CDKN2A | CSMD1 | EGFR  | ERBB2 | FGFR1 | FHIT  | HMGA2 | MET   | MYC   | PDGFRA | PIK3CA | PRDM1 | PTEN  | PTPRD | RB1   | REL   | VEGFA | ZNF217 |
|--------|--------|-------|-------|-------|-------|--------|-------|-------|-------|-------|-------|-------|-------|-------|--------|--------|-------|-------|-------|-------|-------|-------|--------|
| BCL2L1 | 1.000  | .587  | .510  | .533  | .810  | -.212  | .180  | .472  | .548  | .591  | -.377 | .403  | .544  | .613  | .106   | .470   | .112  | .313  | -.011 | .199  | .576  | .059  | .680   |
| EMSY   | .587   | 1.000 | .994  | .603  | .583  | -.887  | .192  | .986  | .707  | .789  | -.578 | .482  | .642  | .640  | -.041  | .919   | .160  | -.125 | -.609 | -.268 | .519  | .015  | .244   |
| CCND1  | .510   | .994  | 1.000 | .587  | .517  | -.927  | .197  | .997  | .709  | .769  | -.575 | .471  | .603  | .597  | -.056  | .913   | .140  | -.175 | -.642 | -.337 | .472  | .034  | .182   |
| CCNE1  | .533   | .603  | .587  | 1.000 | .560  | -.397  | .445  | .606  | .449  | .584  | -.373 | .805  | .378  | .446  | .262   | .695   | .605  | .151  | .175  | -.056 | .754  | .404  | .637   |
| CDK4   | .810   | .583  | .517  | .560  | 1.000 | -.255  | .128  | .490  | .347  | .291  | -.340 | .374  | .560  | .616  | -.250  | .508   | .162  | .672  | -.116 | .467  | .774  | -.142 | .533   |
| CDKN2A | -.212  | -.887 | -.927 | -.397 | -.255 | 1.000  | -.262 | -.941 | -.641 | -.598 | .412  | -.392 | -.506 | -.407 | .203   | -.804  | -.027 | .337  | .775  | .485  | -.248 | -.105 | .122   |
| CSMD1  | .180   | .192  | .197  | .445  | .128  | -.262  | 1.000 | .237  | .099  | .180  | .550  | .657  | .309  | -.027 | -.052  | .226   | .533  | -.147 | .015  | .072  | .298  | .812  | .002   |
| EGFR   | .472   | .986  | .997  | .606  | .490  | -.941  | .237  | 1.000 | .704  | .756  | -.551 | .497  | .585  | .569  | -.057  | .916   | .169  | -.191 | -.635 | -.354 | .473  | .069  | .163   |
| ERBB2  | .548   | .707  | .709  | .449  | .347  | -.641  | .099  | .704  | 1.000 | .639  | -.625 | .551  | .511  | .663  | .092   | .622   | -.088 | -.095 | -.260 | -.567 | .158  | .065  | .505   |
| FGFR1  | .591   | .789  | .769  | .584  | .291  | -.598  | .180  | .756  | .639  | 1.000 | -.494 | .459  | .433  | .564  | .543   | .731   | .391  | -.450 | -.249 | -.398 | .304  | .157  | .449   |
| FHIT   | -.377  | -.578 | -.575 | -.373 | -.340 | .412   | .550  | -.551 | -.625 | -.494 | 1.000 | -.083 | -.161 | -.486 | -.155  | -.555  | .229  | -.084 | .191  | .391  | -.268 | .437  | -.448  |
| HMGA2  | .403   | .482  | .471  | .805  | .374  | -.392  | .657  | .497  | .551  | .459  | -.083 | 1.000 | .641  | .542  | .107   | .589   | .508  | .042  | .183  | -.198 | .476  | .642  | .552   |
| MET    | .544   | .642  | .603  | .378  | .560  | -.506  | .309  | .585  | .511  | .433  | -.161 | .641  | 1.000 | .781  | -.289  | .608   | .033  | .108  | -.296 | -.050 | .343  | .262  | .287   |
| MYC    | .613   | .640  | .597  | .446  | .616  | -.407  | -.027 | .569  | .663  | .564  | -.486 | .542  | .781  | 1.000 | .089   | .518   | .108  | .205  | -.093 | -.190 | .234  | -.036 | .638   |
| PDGFRA | .106   | -.041 | -.056 | .262  | -.250 | .203   | -.052 | -.057 | .092  | .543  | -.155 | .107  | -.289 | .089  | 1.000  | -.020  | .536  | -.444 | .473  | -.292 | -.128 | .112  | .492   |
| PIK3CA | .470   | .919  | .913  | .695  | .508  | -.804  | .226  | .916  | .622  | .731  | -.555 | .589  | .608  | .518  | -.020  | 1.000  | .299  | -.114 | -.482 | -.192 | .666  | .048  | .264   |
| PRDM1  | .112   | .160  | .140  | .605  | .162  | -.027  | .533  | .169  | -.088 | .391  | .229  | .508  | .033  | .108  | .536   | .299   | 1.000 | -.099 | .296  | .217  | .450  | .324  | .348   |
| PTEN   | .313   | -.125 | -.175 | .151  | .672  | .337   | -.147 | -.191 | -.095 | -.450 | -.084 | .042  | .108  | .205  | -.444  | -.114  | -.099 | 1.000 | .297  | .657  | .469  | -.301 | .370   |
| PTPRD  | -.011  | -.609 | -.642 | .175  | -.116 | .775   | .015  | -.635 | -.260 | -.249 | .191  | -.183 | -.296 | -.093 | .473   | -.482  | .296  | .297  | 1.000 | .183  | -.028 | .271  | .555   |
| RB1    | .199   | -.268 | -.337 | -.056 | .467  | .485   | .072  | -.354 | -.567 | -.398 | .391  | -.198 | -.050 | -.190 | -.292  | -.192  | .217  | .657  | .183  | 1.000 | .493  | -.239 | .015   |
| REL    | .576   | .519  | .472  | .754  | .774  | -.248  | .298  | .473  | .158  | .304  | -.268 | .476  | .343  | .234  | -.128  | .666   | .450  | .469  | -.028 | .493  | 1.000 | .027  | .406   |
| VEGFA  | .059   | .015  | .034  | .404  | -.142 | -.105  | .812  | .069  | .065  | .157  | .437  | .642  | .262  | -.036 | .112   | .048   | .324  | -.301 | .271  | -.239 | .027  | 1.000 | .059   |
| ZNF217 | .680   | .244  | .182  | .637  | .533  | .122   | .002  | .163  | .505  | .449  | -.448 | .552  | .287  | .638  | .492   | .264   | .348  | .370  | .555  | .015  | .406  | .059  | 1.000  |
